# Supplementary material for: Chirality memory of α-methylene-π-allyl iridium species
Source: Royal Society of Chemistry journal article supplement (doi:10.1039/d1sc02636d), 2021-01-01
Supplement: d1sc02636d1.pdf [file d1sc02636d1.pdf]

# Elucidating the Chirality Memory of $\alpha$ -alkylidene- $\pi$ -allyl Iridium Species

Chemical  
Science

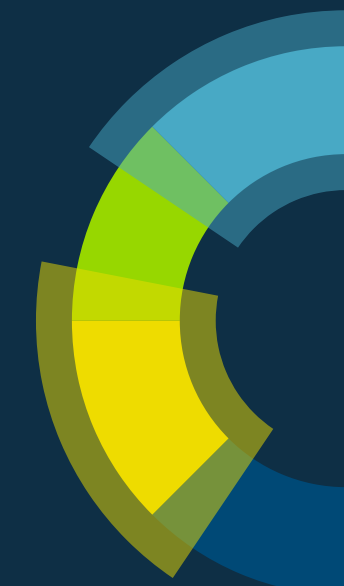

Organic molecules with chirality can be used to develop chiral drugs and derivatives of natural products

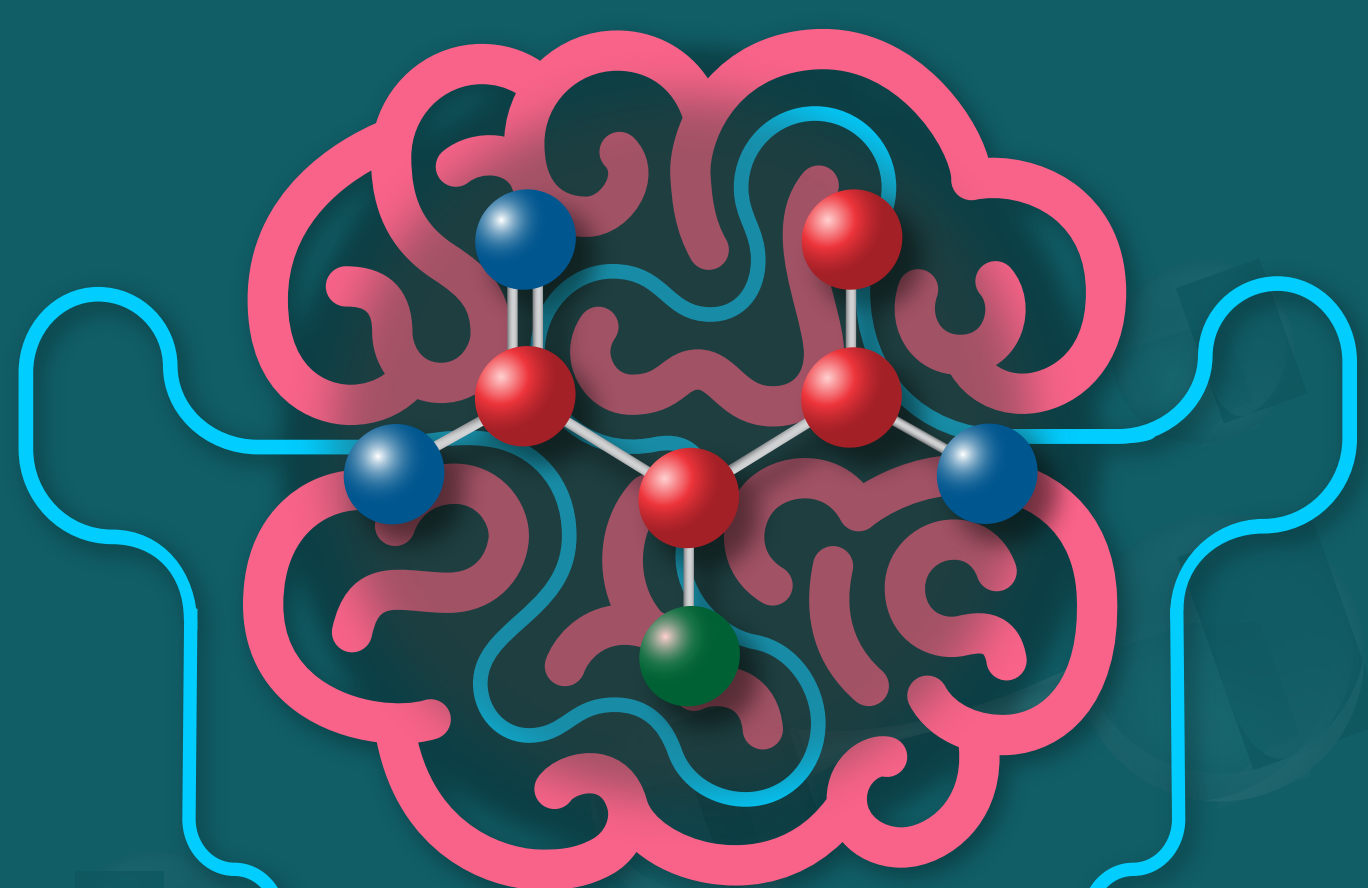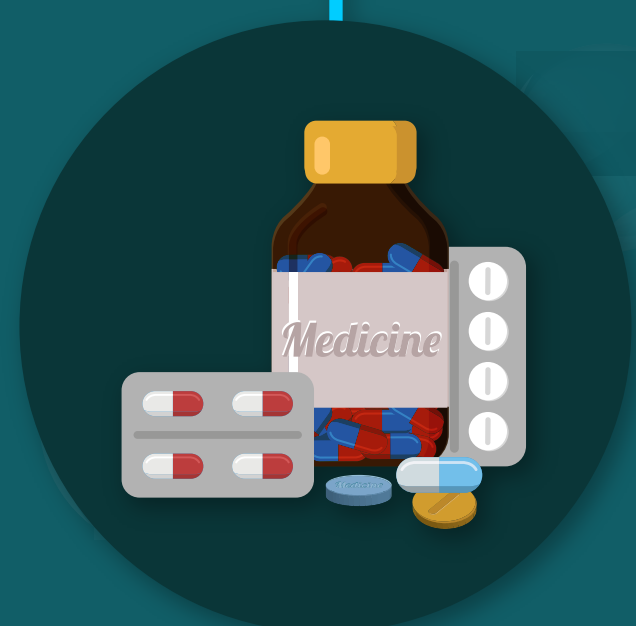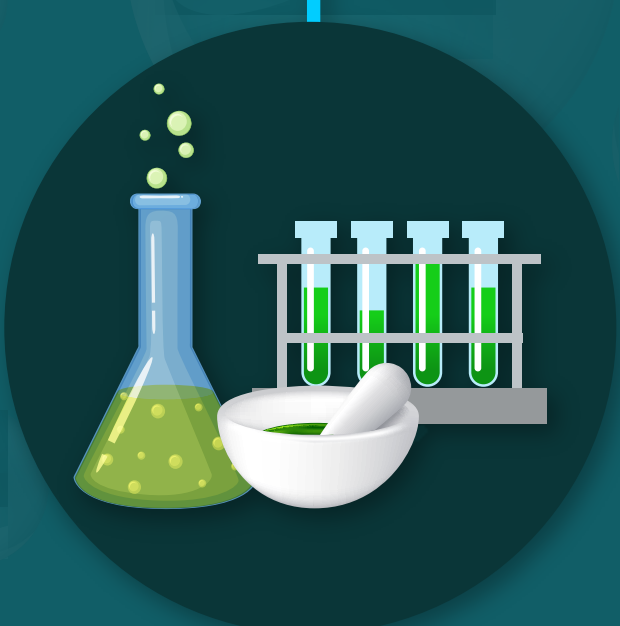

Memory of chirality (MOC) of 2,3-allenyl carbonates with chiral information stored across 3 carbons has not been explored yet

MOC of 2,3-allenyl carbonates realized through an optically active  $\alpha$ -alkylidene- $\pi$ -allyl iridium intermediate

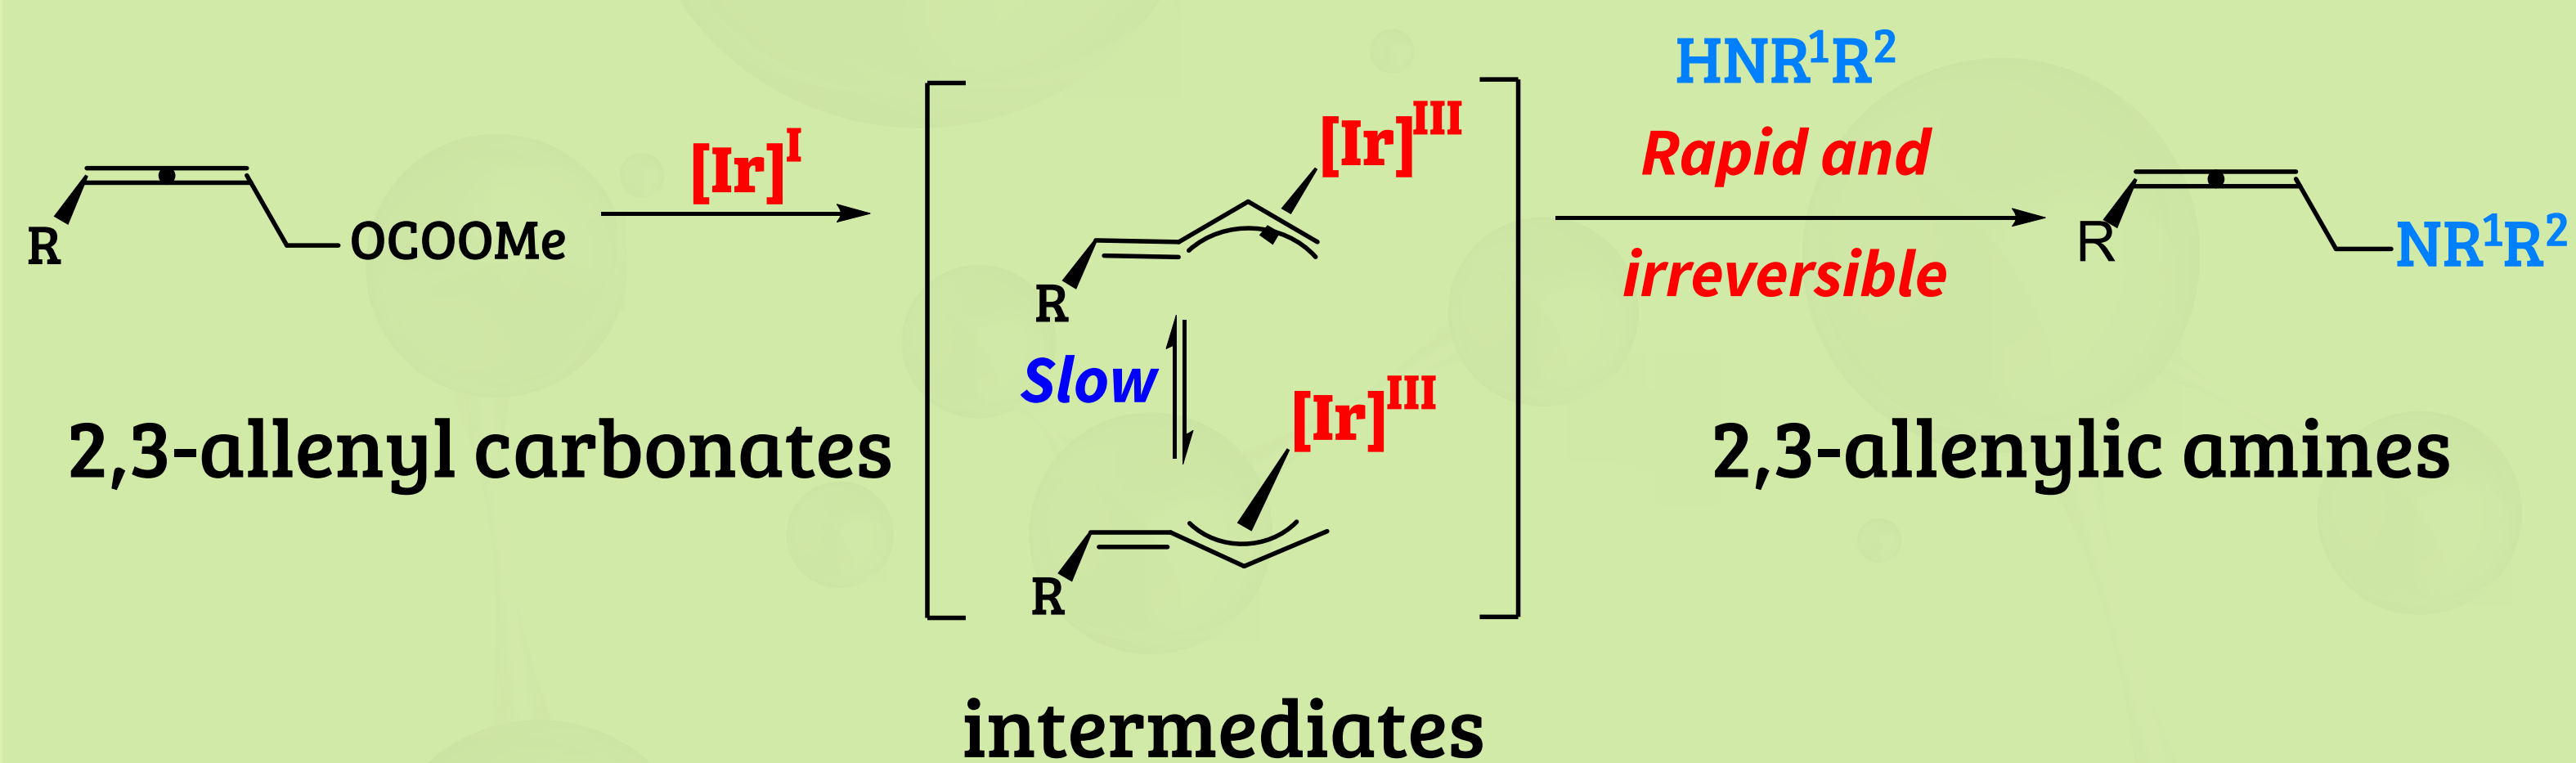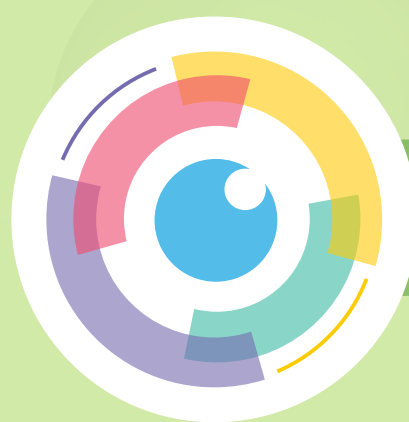

Optical activity transferred

The reported mechanism

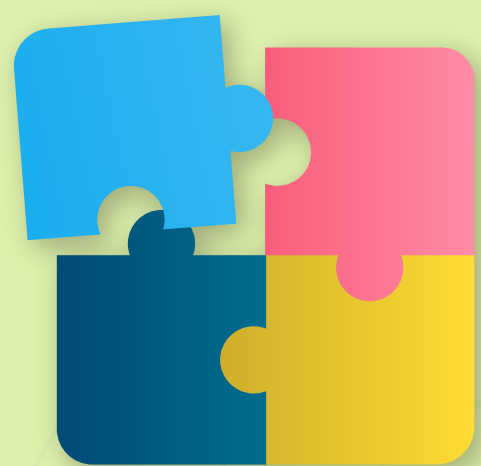

Shows compatibility with bulky and small substituents on amine/allenyl carbonate

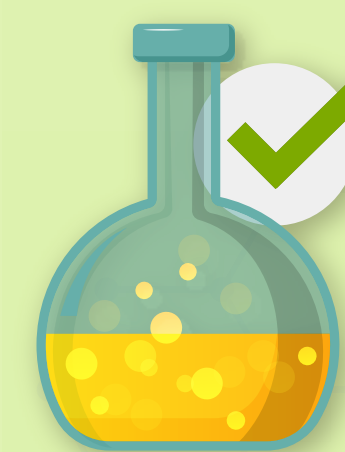

Furnishes desired optically active product

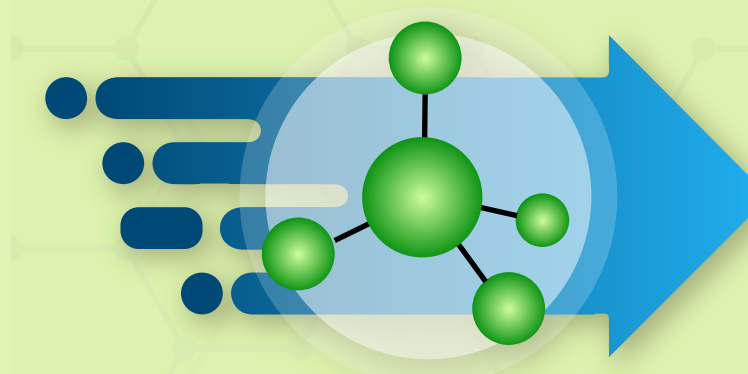

Ensures high efficiency of chirality transfer

MOC involving  $\alpha$ -alkylidene- $\pi$ -allyl iridium species is recorded for the first time in a robust, stereoselective approach to asymmetric allene synthesis
